# Supplementary material for: Long term effects of once-only flexible sigmoidoscopy screening after 17 years of follow-up: the UK Flexible Sigmoidoscopy Screening randomised controlled trial
Source: PubMed Central journal article supplement (PMC6168937; doi:10.1016/s0140-6736(17)30396-3), 2017-04-01
Supplement: mmc1.pdf [file mmc1.pdf]

# THE LANCET

## Supplementary appendix

This appendix formed part of the original submission and has been peer reviewed. We post it as supplied by the authors.

Supplement to: Atkin W, Wooldrage K, Parkin DM, et al. Long term effects of once-only flexible sigmoidoscopy screening after 17 years of follow-up: the UK Flexible Sigmoidoscopy Screening randomised controlled trial. *Lancet* 2017; published online Feb 21. [http://dx.doi.org/10.1016/S0140-6736\(17\)30396-3](http://dx.doi.org/10.1016/S0140-6736(17)30396-3).

**Supplementary Figure 1: Trial Profile**

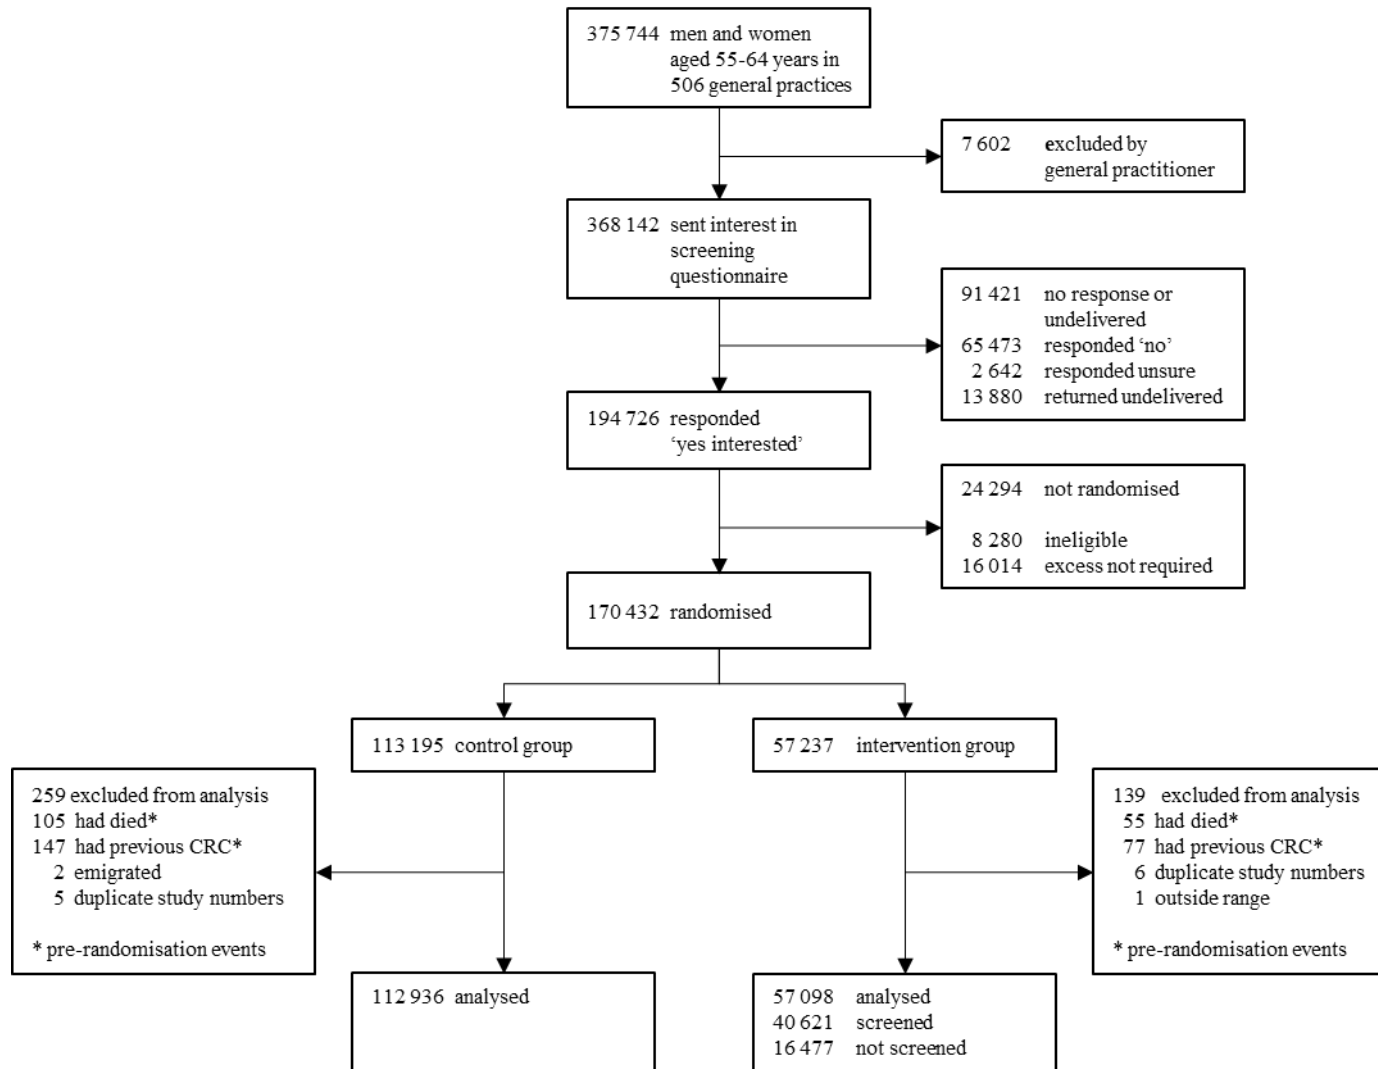

**Supplementary Table 1. Colorectal cancer incidence and mortality by sex and age groups, randomisation and compliance with screening**

|                  |          | Control group<br>(Men: 55-59yrs n=27,706,<br>60-64yrs n=27,633<br>Women: 55-59yrs n=29,129,<br>60-64yrs n=28,468) |               | Invited to screening group |               |       |               | Screened<br>(Men: 55-59yrs n=10,300,<br>60-64yrs n=10,189<br>Women: 55-59yrs n=10,137,<br>60-64yrs n=9,995) |               | Hazard ratio<br>(95% CI);<br>invited to<br>screening vs<br>control group | p-<br>value | Hazard ratio<br>(95% CI);<br>screened vs<br>control group* | p-<br>value |
|------------------|----------|-------------------------------------------------------------------------------------------------------------------|---------------|----------------------------|---------------|-------|---------------|-------------------------------------------------------------------------------------------------------------|---------------|--------------------------------------------------------------------------|-------------|------------------------------------------------------------|-------------|
|                  |          | Cases                                                                                                             | Rate (95% CI) | Cases                      | Rate (95% CI) | Cases | Rate (95% CI) | Cases                                                                                                       | Rate (95% CI) |                                                                          |             |                                                            |             |
| <b>Incidence</b> |          |                                                                                                                   |               |                            |               |       |               |                                                                                                             |               |                                                                          |             |                                                            |             |
| All sites        |          |                                                                                                                   |               |                            |               |       |               |                                                                                                             |               |                                                                          |             |                                                            |             |
| Men              | 55-59yrs | 858†                                                                                                              | 198 (185-212) | 297‡                       | 135 (121-151) | 108†  | 197 (163-238) | 189‡                                                                                                        | 115 (99-132)  | 0.68 (0.60-0.78)                                                         | 0.530       | 0.58 (0.48-0.69)                                           | 0.578       |
|                  | 60-64yrs | 1,123†                                                                                                            | 276 (260-292) | 412‡                       | 199 (181-219) | 155†  | 297 (253-347) | 257‡                                                                                                        | 166 (147-188) | 0.72 (0.64-0.81)                                                         |             | 0.62 (0.53-0.72)                                           |             |
| Women            | 55-59yrs | 545†                                                                                                              | 114 (105-124) | 224‡                       | 94 (82-107)   | 81†   | 115 (93-143)  | 143‡                                                                                                        | 85 (72-100)   | 0.82 (0.70-0.96)                                                         | 0.717       | 0.75 (0.60-0.93)                                           | 0.711       |
|                  | 60-64yrs | 727†                                                                                                              | 162 (151-174) | 297‡                       | 129 (115-144) | 110†  | 158 (131-190) | 187‡                                                                                                        | 116 (100-134) | 0.79 (0.69-0.91)                                                         |             | 0.71 (0.58-0.86)                                           |             |
| Distal§          |          |                                                                                                                   |               |                            |               |       |               |                                                                                                             |               |                                                                          |             |                                                            |             |
| Men              | 55-59yrs | 590¶                                                                                                              | 136 (125-147) | 158‡¶                      | 72 (61-84)    | 69¶   | 126 (99-159)  | 89‡¶                                                                                                        | 54 (44-66)    | 0.53 (0.44-0.63)                                                         | 0.146       | 0.39 (0.30-0.49)                                           | 0.180       |
|                  | 60-64yrs | 717¶                                                                                                              | 175 (163-189) | 228‡¶                      | 110 (96-125)  | 101¶  | 193 (158-234) | 127‡¶                                                                                                       | 82 (69-97)    | 0.63 (0.54-0.73)                                                         |             | 0.48 (0.39-0.60)                                           |             |
| Women            | 55-59yrs | 291¶                                                                                                              | 61 (54-68)    | 89‡¶                       | 37 (30-46)    | 39¶   | 55 (40-76)    | 50‡¶                                                                                                        | 30 (23-39)    | 0.61 (0.48-0.78)                                                         | 0.763       | 0.47 (0.33-0.66)                                           | 0.591       |
|                  | 60-64yrs | 389¶                                                                                                              | 87 (78-96)    | 117‡¶                      | 50 (42-61)    | 58¶   | 83 (64-107)   | 59‡¶                                                                                                        | 36 (28-47)    | 0.58 (0.47-0.72)                                                         |             | 0.41 (0.30-0.56)                                           |             |
| Proximal         |          |                                                                                                                   |               |                            |               |       |               |                                                                                                             |               |                                                                          |             |                                                            |             |
| Men              | 55-59yrs | 264¶                                                                                                              | 61 (54-68)    | 127‡¶                      | 58 (48-69)    | 35¶   | 64 (46-89)    | 92‡¶                                                                                                        | 56 (45-68)    | 0.95 (0.77-1.18)                                                         | 0.445       | 0.93 (0.70-1.24)                                           | 0.432       |
|                  | 60-64yrs | 417¶                                                                                                              | 102 (92-112)  | 181‡¶                      | 87 (75-101)   | 55¶   | 104 (80-136)  | 126‡¶                                                                                                       | 81 (68-96)    | 0.85 (0.72-1.02)                                                         |             | 0.80 (0.64-1.02)                                           |             |
| Women            | 55-59yrs | 251¶                                                                                                              | 52 (46-59)    | 129‡¶                      | 54 (45-64)    | 42¶   | 60 (44-81)    | 87‡¶                                                                                                        | 52 (42-64)    | 1.03 (0.83-1.27)                                                         | 0.884       | 1.04 (0.76-1.44)                                           | 0.884       |
|                  | 60-64yrs | 323¶                                                                                                              | 72 (64-80)    | 175‡¶                      | 76 (65-88)    | 50¶   | 71 (54-94)    | 125‡¶                                                                                                       | 77 (65-92)    | 1.05 (0.87-1.26)                                                         |             | 1.08 (0.83-1.40)                                           |             |
| <b>Mortality</b> |          |                                                                                                                   |               |                            |               |       |               |                                                                                                             |               |                                                                          |             |                                                            |             |
| CRC**            |          |                                                                                                                   |               |                            |               |       |               |                                                                                                             |               |                                                                          |             |                                                            |             |
| Men              | 55-59yrs | 258††                                                                                                             | 59 (52-67)    | 84††                       | 38 (31-47)    | 38††  | 69 (50-95)    | 46††                                                                                                        | 28 (21-37)    | 0.64 (0.50-0.82)                                                         | 0.666       | 0.50 (0.35-0.71)                                           | 0.485       |
|                  | 60-64yrs | 348††                                                                                                             | 84 (76-94)    | 122††                      | 58 (49-70)    | 45††  | 85 (63-114)   | 77††                                                                                                        | 49 (39-62)    | 0.69 (0.56-0.85)                                                         |             | 0.59 (0.44-0.78)                                           |             |
| Women            | 55-59yrs | 164††                                                                                                             | 34 (29-40)    | 57††                       | 24 (18-31)    | 26††  | 37 (25-54)    | 31††                                                                                                        | 18 (13-26)    | 0.70 (0.52-0.94)                                                         | 0.601       | 0.55 (0.35-0.87)                                           | 0.419       |
|                  | 60-64yrs | 226††                                                                                                             | 50 (44-57)    | 90††                       | 39 (31-48)    | 29††  | 41 (29-59)    | 61††                                                                                                        | 38 (29-48)    | 0.77 (0.60-0.99)                                                         |             | 0.70 (0.50-0.97)                                           |             |
| Distal CRC§**    |          |                                                                                                                   |               |                            |               |       |               |                                                                                                             |               |                                                                          |             |                                                            |             |
| Men              | 55-59yrs | 168‡‡                                                                                                             | 38 (33-45)    | 42‡‡                       | 19 (14-26)    | 26‡‡  | 47 (32-69)    | 16‡‡                                                                                                        | 10 (6-16)     | 0.49 (0.35-0.69)                                                         | 0.804       | 0.27 (0.15-0.48)                                           | 0.421       |
|                  | 60-64yrs | 211‡‡                                                                                                             | 51 (45-59)    | 56‡‡                       | 27 (21-35)    | 27‡‡  | 51 (35-74)    | 29‡‡                                                                                                        | 19 (13-27)    | 0.52 (0.39-0.70)                                                         |             | 0.36 (0.24-0.55)                                           |             |

|               |          |       |                  |       |                  |       |                  |       |                  |                  |       |                  |       |
|---------------|----------|-------|------------------|-------|------------------|-------|------------------|-------|------------------|------------------|-------|------------------|-------|
| Women         | 55-59yrs | 74‡‡  | 15 (12-19)       | 20‡‡  | 8 (5-13)         | 14‡‡  | 20 (12-33)       | 6‡‡   | 4 (2-8)          | 0.54 (0.33-0.89) | 0.539 | 0.26 (0.10-0.67) | 0.284 |
|               | 60-64yrs | 91‡‡  | 20 (16-25)       | 31‡‡  | 13 (9-19)        | 16‡‡  | 23 (14-37)       | 15‡‡  | 9 (6-15)         | 0.66 (0.44-0.99) |       | 0.49 (0.25-0.93) |       |
| Proximal CC** |          |       |                  |       |                  |       |                  |       |                  |                  |       |                  |       |
| Men           | 55-59yrs | 78‡‡  | 18 (14-22)       | 36‡‡  | 16 (12-23)       | 10‡‡  | 18 (10-34)       | 26‡‡  | 16 (11-23)       | 0.91 (0.61-1.35) | 0.789 | 0.88 (0.52-1.50) | 0.786 |
|               | 60-64yrs | 123‡‡ | 30 (25-36)       | 61‡‡  | 29 (23-38)       | 17‡‡  | 32 (20-52)       | 44‡‡  | 28 (21-38)       | 0.98 (0.72-1.33) |       | 0.97 (0.64-1.48) |       |
| Women         | 55-59yrs | 80‡‡  | 17 (13-21)       | 33‡‡  | 14 (10-19)       | 12‡‡  | 17 (10-30)       | 21‡‡  | 12 (8-19)        | 0.83 (0.55-1.24) | 0.832 | 0.75 (0.42-1.35) | 0.731 |
|               | 60-64yrs | 122‡‡ | 27 (23-32)       | 55‡‡  | 24 (18-31)       | 11‡‡  | 16 (9-28)        | 44‡‡  | 27 (20-36)       | 0.87 (0.64-1.20) |       | 0.85 (0.58-1.25) |       |
| Non-CRC**     |          |       |                  |       |                  |       |                  |       |                  |                  |       |                  |       |
| Men           | 55-59yrs | 5,939 | 1358 (1324-1393) | 3,027 | 1368 (1321-1418) | 1,077 | 1950 (1837-2070) | 1,950 | 1175 (1124-1228) | 1.01 (0.96-1.05) | 0.628 | 1.01 (0.95-1.08) | 0.634 |
|               | 60-64yrs | 9,038 | 2193 (2149-2239) | 4,685 | 2241 (2178-2307) | 1,581 | 2985 (2842-3136) | 3,104 | 1989 (1920-2060) | 1.02 (0.99-1.06) |       | 1.03 (0.98-1.09) |       |
| Women         | 55-59yrs | 4,071 | 849 (824-876)    | 2,072 | 866 (829-904)    | 826   | 1168 (1091-1250) | 1,246 | 739 (699-781)    | 1.02 (0.97-1.08) | 0.063 | 1.03 (0.94-1.13) | 0.790 |
|               | 60-64yrs | 6,365 | 1409 (1374-1444) | 3,142 | 1351 (1305-1399) | 1,232 | 1754 (1659-1855) | 1,910 | 1177 (1125-1231) | 0.96 (0.92-1.00) |       | 0.93 (0.87-1.00) |       |
| All cause     |          |       |                  |       |                  |       |                  |       |                  |                  |       |                  |       |
| Men           | 55-59yrs | 6,197 | 1417 (1382-1453) | 3,111 | 1406 (1358-1457) | 1,115 | 2019 (1904-2141) | 1,996 | 1203 (1151-1257) | 0.99 (0.95-1.04) | 0.547 | 0.99 (0.92-1.06) | 0.545 |
|               | 60-64yrs | 9,386 | 2278 (2232-2324) | 4,807 | 2300 (2236-2366) | 1,626 | 3070 (2925-3223) | 3,181 | 2038 (1969-2110) | 1.01 (0.98-1.05) |       | 1.01 (0.96-1.07) |       |
| Women         | 55-59yrs | 4,235 | 883 (857-911)    | 2,129 | 890 (853-928)    | 852   | 1204 (1126-1288) | 1,277 | 757 (717-800)    | 1.01 (0.96-1.06) | 0.086 | 1.01 (0.93-1.10) | 0.107 |
|               | 60-64yrs | 6,591 | 1459 (1424-1494) | 3,232 | 1390 (1343-1439) | 1,261 | 1795 (1699-1897) | 1,971 | 1215 (1162-1269) | 0.95 (0.91-0.99) |       | 0.93 (0.87-0.99) |       |

Rates are per 100,000 person-years.

P-values are for test of interaction.

CRC=colorectal cancer. CC=colon cancer.

\*Adjusted for non-compliance with screening. †108 site not specified cancers were included, 72 in controls and 36 in the invited to screening group (8 were not screened and 28 were screened). Only the earliest cancer was counted for patients with more than one cancer. ‡140 patients had cancers detected at baseline screening (126 distal cancers and 14 proximal cancers). §Distal was defined as the rectum and sigmoid colon. ¶71 patients had both a distal and a proximal cancer (30 were synchronous and 41 were metachronous): 61 patients were controls and 10 were in the invited to screening group (3 were not screened and 7 were screened). \*\*Deaths certified by the Office for National Statistics as colorectal cancer as underlying cause of death by automatic coding. ††51 deaths in patients with unspecified site cancers were included, 36 controls and 15 invited to screening (4 were not screened and 11 were screened). ‡‡17 deaths occurred among patients with both a proximal and a distal cancer diagnosed (13 controls and 4 invited to screening [1 was not screened and 3 were screened]) and these deaths were excluded from the site specific deaths.

**Supplementary Table 2. Verified colorectal cancer mortality in control and intervention groups and by gender**

|                           | Control group<br>(n=112,936) |                  | Invited to screening group<br>(n=57,098) |                  |                            |                        | Hazard ratio<br>(95% CI);<br>invited to<br>screening vs<br>control group | p-<br>value      | Hazard ratio<br>(95% CI);<br>screened vs control<br>group* | p-value |                  |         |
|---------------------------|------------------------------|------------------|------------------------------------------|------------------|----------------------------|------------------------|--------------------------------------------------------------------------|------------------|------------------------------------------------------------|---------|------------------|---------|
|                           | Cases                        | Rate (95% CI)    | Cases                                    | Rate (95% CI)    | Not screened<br>(n=16,477) | Screened<br>(n=40,621) |                                                                          |                  |                                                            |         |                  |         |
| <b>CRC mortality†</b>     |                              |                  |                                          |                  |                            |                        |                                                                          |                  |                                                            |         |                  |         |
| All participants          | 1188                         | 67 (63-71)       | 416                                      | 46 (42-51)       | 166                        | 67 (57-78)             | 250                                                                      | 38 (34-43)       | 0.69 (0.62-0.77)                                           | <0.0001 | 0.57 (0.49-0.67) | <0.0001 |
| Men                       | 732                          | 86 (80-93)       | 244                                      | 57 (50-64)       | 101                        | 93 (77-113)            | 143                                                                      | 44 (38-52)       | 0.66 (0.57-0.76)                                           | 0.291‡  | 0.53 (0.43-0.65) | 0.234‡  |
| Women                     | 456                          | 49 (45-54)       | 172                                      | 36 (31-42)       | 65                         | 46 (36-59)             | 107                                                                      | 32 (27-39)       | 0.74 (0.62-0.89)                                           |         |                  |         |
| Age 55-59yrs              | 501                          | 55 (50-60)       | 168                                      | 36 (31-42)       | 74                         | 59 (47-74)             | 94                                                                       | 28 (23-34)       | 0.67 (0.56-0.80)                                           | 0.637‡  | 0.53 (0.41-0.68) | 0.435‡  |
| Age 60-64yrs              | 687                          | 80 (74-86)       | 248                                      | 56 (50-64)       | 92                         | 75 (61-92)             | 156                                                                      | 49 (42-57)       | 0.71 (0.61-0.82)                                           |         |                  |         |
| <b>Non-CRC mortality†</b> |                              |                  |                                          |                  |                            |                        |                                                                          |                  |                                                            |         |                  |         |
| All participants          | 25221                        | 1416 (1399-1434) | 12863                                    | 1426 (1402-1451) | 4688                       | 1881 (1828-1936)       | 8175                                                                     | 1252 (1225-1280) | 1.01 (0.99-1.03)                                           | 0.558   | 1.01 (0.98-1.05) | 0.538   |
| Men                       | 14851                        | 1748 (1721-1777) | 7674                                     | 1784 (1744-1824) | 2640                       | 2440 (2349-2535)       | 5034                                                                     | 1563 (1521-1607) | 1.02 (0.99-1.05)                                           | 0.134‡  | 1.03 (0.99-1.08) | 0.146‡  |
| Women                     | 10370                        | 1114 (1092-1135) | 5189                                     | 1100 (1070-1130) | 2048                       | 1453 (1391-1517)       | 3141                                                                     | 949 (917-983)    | 0.99 (0.95-1.02)                                           |         |                  |         |
| Age 55-59yrs              | 9931                         | 1083 (1062-1105) | 5,072                                    | 1101 (1071-1132) | 1893                       | 1503 (1437-1572)       | 3179                                                                     | 950 (918-984)    | 1.02 (0.98-1.05)                                           | 0.333‡  | 1.03 (0.97-1.08) | 0.366‡  |
| Age 60-64yrs              | 15290                        | 1770 (1742-1798) | 7,791                                    | 1764 (1726-1804) | 2795                       | 2269 (2186-2354)       | 4996                                                                     | 1569 (1526-1614) | 1.00 (0.97-1.02)                                           |         |                  |         |

Rates are per 100,000 person-years.

CRC=colorectal cancer.

\*Adjusted for non-compliance with screening. † Assignment of colorectal cancer as underlying cause of death by independent expert coder. ‡ P-value for test of heterogeneity of effect by gender or by age group.

**Supplementary Table 3. Colorectal cancer incidence and mortality in control and intervention groups by participation in guaiac faecal occult blood screening (gFOBT) within the Bowel Cancer Screening Programme (BCSP)**

|                                                             | Control group<br>(n = 112,936) |                  |               | Invited to screening group<br>(n = 57,098) |                  |               | Hazard ratio (95% CI);<br>invited to screening vs<br>control group | p-value |
|-------------------------------------------------------------|--------------------------------|------------------|---------------|--------------------------------------------|------------------|---------------|--------------------------------------------------------------------|---------|
|                                                             | Cases                          | Person-<br>years | Rate (95% CI) | Cases                                      | Person-<br>years | Rate (95% CI) |                                                                    |         |
| <b>By participation in gFOBT screening within the BCSP*</b> |                                |                  |               |                                            |                  |               |                                                                    |         |
| All-site colorectal cancer incidence                        |                                |                  |               |                                            |                  |               |                                                                    |         |
| Not participated                                            | 2,842                          | 1,576,329        | 180 (174-187) | 1,084                                      | 803,146          | 135 (127-143) | 0.75 (0.70 – 0.80)                                                 | 0.798   |
| Participated                                                | 411                            | 189,766          | 217 (197-239) | 146                                        | 92,720           | 157 (134-185) | 0.73 (0.60 – 0.88)                                                 |         |
| Distal colorectal cancer incidence                          |                                |                  |               |                                            |                  |               |                                                                    |         |
| Not participated                                            | 1,757                          | 1,580,613        | 111 (106-116) | 534                                        | 805,569          | 66 (61-72)    | 0.60 (0.54 – 0.66)                                                 | 0.353   |
| Participated                                                | 230                            | 190,171          | 121 (106-138) | 58                                         | 92,924           | 62 (48-81)    | 0.52 (0.39 – 0.69)                                                 |         |
| Proximal colon cancer incidence                             |                                |                  |               |                                            |                  |               |                                                                    |         |
| Not participated                                            | 1,078                          | 1,585,450        | 68 (64-72)    | 527                                        | 806,658          | 65 (60-71)    | 0.96 (0.86 – 1.06)                                                 | 0.847   |
| Participated                                                | 177                            | 190,457          | 93 (80-108)   | 85                                         | 92,900           | 91 (74-113)   | 0.98 (0.76 – 1.27)                                                 |         |
| Colorectal cancer mortality†                                |                                |                  |               |                                            |                  |               |                                                                    |         |
| Not participated                                            | 917                            | 1,589,869        | 58 (54-62)    | 323                                        | 809,093          | 40 (36-45)    | 0.69 (0.61 – 0.78)                                                 | 0.589   |
| Participated                                                | 79                             | 190,869          | 41 (33-52)    | 30                                         | 93,105           | 32 (23-46)    | 0.78 (0.51 – 1.19)                                                 |         |
| Distal colorectal cancer mortality†                         |                                |                  |               |                                            |                  |               |                                                                    |         |
| Not participated                                            | 511                            | 1,589,869        | 32 (29-35)    | 143                                        | 809,093          | 18 (15-21)    | 0.55 (0.46 - 0.66)                                                 | 0.378   |
| Participated                                                | 33                             | 190,869          | 17 (12-24)    | 6                                          | 93,105           | 6 (3-14)      | 0.37 (0.16 - 0.89)                                                 |         |
| Proximal colorectal cancer mortality†                       |                                |                  |               |                                            |                  |               |                                                                    |         |
| Not participated                                            | 364                            | 1,589,869        | 23 (21-25)    | 164                                        | 809,093          | 20 (17-24)    | 0.88 (0.73 – 1.06)                                                 | 0.437   |
| Participated                                                | 39                             | 190,869          | 20 (15-28)    | 21                                         | 93,105           | 23 (15-35)    | 1.10 (0.65 - 1.88)                                                 |         |

Rates are per 100,000 person-years.

P-values are for test for heterogeneity of effect by participation in the BCSP.

\*Of the control group, 78,699 (69.7%) did not participate and 34,237 (30.3%) did participate. Of the invited to screening group, 40,264 (70.5%) did not participate and 16,834 (29.5%) did participate. Participation was counted from the time a participant returned their first kit. People could contribute person-years to both not participated and participated follow-up time but after participation a person was considered to remain exposed. † Deaths certified by the Office for National Statistics as colorectal cancer as underlying cause of death by automatic coding

**Supplementary Table 4. Distal colorectal and proximal colon cancer incidence and mortality by randomisation and compliance with screening where distal colorectal also includes the descending colon**

|              | Control group<br>(n=112,936) |               | Invited to screening group<br>(n=57,098) |               |                            |               | Hazard ratio<br>(95% CI);<br>invited to<br>screening vs<br>control group | p-<br>value | Hazard ratio<br>(95% CI);<br>screened vs control<br>group* | p-value |                        |         |
|--------------|------------------------------|---------------|------------------------------------------|---------------|----------------------------|---------------|--------------------------------------------------------------------------|-------------|------------------------------------------------------------|---------|------------------------|---------|
|              | Cases                        | Rate (95% CI) | Cases                                    | Rate (95% CI) | Not screened<br>(n=16,477) |               |                                                                          |             |                                                            |         | Screened<br>(n=40,621) |         |
| Incidence    |                              |               |                                          |               |                            |               |                                                                          |             |                                                            |         |                        |         |
| Distal†      | 2,080‡                       | 117 (113-123) | 647‡§                                    | 72 (67-78)    | 285‡                       | 115 (102-129) | 362‡§                                                                    | 56 (50-62)  | 0.61 (0.56-0.67)                                           | <0.0001 | 0.47 (0.41-0.53)       | <0.0001 |
| Proximal     | 1,166‡                       | 66 (62-70)    | 556‡§                                    | 62 (57-67)    | 163‡                       | 66 (56-76)    | 393‡§                                                                    | 60 (55-67)  | 0.94 (0.85-1.04)                                           | 0.235   | 0.92 (0.80-1.06)       | 0.235   |
| Mortality    |                              |               |                                          |               |                            |               |                                                                          |             |                                                            |         |                        |         |
| Distal CRC†¶ | 573**                        | 32 (30-35)    | 162**                                    | 18 (15-21)    | 88**                       | 35 (29-44)    | 74**                                                                     | 11 (9-14)   | 0.56 (0.47-0.66)                                           | <0.0001 | 0.37 (0.28-0.48)       | <0.0001 |
| Proximal CC¶ | 372**                        | 21 (19-23)    | 172**                                    | 19 (16-22)    | 45**                       | 18 (13-24)    | 127**                                                                    | 19 (16-23)  | 0.91 (0.76-1.09)                                           | 0.316   | 0.89 (0.70-1.12)       | 0.315   |

Rates are per 100,000 person-years.

CRC=colorectal cancer.

CC=colon cancer.

\* Adjusted for non-compliance with screening. †Distal was defined as the rectum, sigmoid and descending colon. ‡74 patients had both a distal and a proximal cancer (29 were synchronous and 45 were metachronous): 65 patients were controls and 9 were in the invited to screening group (2 were not screened and 7 were screened). §140 patients had cancers detected at baseline screening (133 distal cancers and 7 proximal cancers). ¶Deaths certified by the Office for National Statistics as colorectal cancer as underlying cause of death by automatic coding. \*\*19 deaths occurred among patients with both a proximal and a distal cancer diagnosed (15 controls and 4 invited to screening [1 was not screened and 3 were screened]) and these deaths were excluded from the site specific deaths.

**Supplementary Table 5. Comparison of colorectal cancer incidence and mortality in control and intervention groups analysed with censoring at first event in household**

|                               | <b>Hazard ratio (95% CI);<br/>intervention vs control<br/>group*</b> | <b>p-value</b> |
|-------------------------------|----------------------------------------------------------------------|----------------|
| <b>Incidence</b>              |                                                                      |                |
| All-site                      | 0.75 (0.70 - 0.80)                                                   | <0.0001        |
| Distal‡                       | 0.59 (0.54 - 0.64)                                                   | <0.0001        |
| Proximal                      | 0.96 (0.87 - 1.06)                                                   | 0.434          |
| <b>Mortality</b>              |                                                                      |                |
| Colorectal cancer¶            | 0.70 (0.62 - 0.79)                                                   | <0.0001        |
| Distal colorectal cancer‡¶    | 0.54 (0.45 - 0.65)                                                   | <0.0001        |
| Proximal colon cancer¶        | 0.91 (0.76 - 1.08)                                                   | 0.261          |
| Non-colorectal cancer causes¶ | 1.00 (0.98 - 1.02)                                                   | 0.858          |
| All cause                     | 0.99 (0.97 - 1.01)                                                   | 0.391          |

\*Hazard ratios estimated from Cox proportional hazards models where, for each outcome, the follow-up time of other members of a household were censored at the date of first outcome in the household.

‡Distal was defined as the rectum and sigmoid colon. ¶Deaths certified by the Office for National Statistics as colorectal cancer as underlying cause of death by automatic coding.
